# Supplementary material for: Novel genetic variants associated with lumbar disc degeneration in northern Europeans: a meta-analysis of 4600 subjects
Source: HighWire-hosted journal article supplement (doi:10.1136/annrheumdis-2012-201551), 2012-09-20

**Supplementary Table 1. Genotyping and imputation methods by study**

|                                  | <b>FHS</b>                 | <b>GARP</b>                | <b>RS1</b>                 | <b>RS3</b>                 | <b>TUK</b>                    |
|----------------------------------|----------------------------|----------------------------|----------------------------|----------------------------|-------------------------------|
| <i><u>Genotyping</u></i>         |                            |                            |                            |                            |                               |
| Platform                         | Affymetrix                 | Illumina                   | Illumina                   | Illumina                   | Illumina                      |
| Chip                             | 500K or 100K or 10 K       | Human660W quad             | Human Hap550               | Human Hap550               | Human Hap300 or Human Hap610Q |
| Call rate                        | >0.97                      | > 0.95                     | > 0.975                    | > 0.975                    | >0.90                         |
| MAF                              | > 0.05                     | > 0.0025                   | > 0.01                     | > 0.01                     | >0.01                         |
| HWE p-value                      | > 10 <sup>-6</sup>         | > 10 <sup>-6</sup>         | > 10 <sup>-6</sup>         | > 10 <sup>-6</sup>         | > 10 <sup>-4</sup>            |
| <i><u>Imputation</u></i>         |                            |                            |                            |                            |                               |
| Variants included for imputation | 534,982                    | 462,361                    | 512,349                    | 514,073                    | 314,075                       |
| Imputation software              | MACH vs1                   | IMPUTE                     | MACH                       | MACH                       | IMPUTE vs 2                   |
| Genome build                     | HapMap Phase II release 22 | Hapmap Phase II release 21 | Hapmap Phase II release 22 | Hapmap Phase II release 22 | Hapmap Phase II release 36    |
| Total number of SNPs available   | 2,543,887                  | 1,830,498                  | 2,543,887                  | 2,543,887                  | 3,044,064                     |

**Legend to Supplementary Table 1**

FHS represents Framingham Heart Study; GARP, Genetics of OsteoArthrosis and Progression study; RS1, Rotterdam study cohort 1; RS3:, Rotterdam study cohort 3; TUK, TwinsUK: BMI, body mass index; MAF, Minor Allele Frequency; HWE, Hardy-Weinberg equilibrium

**Supplementary Table 2. Results of the GWA meta-analysis adjusted for age and sex, showing those SNPs having  $p < 10^{-5}$ .**

| SNP        | Chr | gene  | N    | MAF  |      |      |      |      | Imputation Quality* |      |      |      |       | Eff | BETA  | SE    | P        |
|------------|-----|-------|------|------|------|------|------|------|---------------------|------|------|------|-------|-----|-------|-------|----------|
|            |     |       |      | RS1  | RS3  | TUK  | FHS  | GARP | RS1                 | RS3  | TUK  | FHS  | GARP  |     |       |       |          |
| rs926849   | 6   | PARK2 | 3939 | 0.31 | 0.32 | NA   | 0.31 | 0.23 | 0.98                | 0.99 | NA   | 0.9  | 95.04 | C   | -0.12 | 0.023 | 9.50E-08 |
| rs17034687 | 3   | NA    | 4429 | 0.09 | 0.1  | 0.05 | 0.08 | NA   | 0.92                | 0.93 | 0.88 | 0.82 | NA    | C   | 0.19  | 0.037 | 3.67E-07 |
| rs2187689  | 6   | NA    | 4457 | 0.08 | 0.07 | 0.06 | 0.09 | NA   | 0.98                | 0.99 | 0.95 | 0.93 | NA    | C   | 0.19  | 0.039 | 6.63E-07 |
| rs7767277  | 6   | NA    | 4457 | 0.08 | 0.07 | 0.06 | 0.09 | NA   | 0.98                | 0.99 | 0.95 | 0.93 | NA    | A   | 0.19  | 0.039 | 6.64E-07 |
| rs9488238  | 6   | NA    | 4464 | 0.04 | 0.03 | 0.02 | 0.03 | NA   | 0.87                | 0.88 | 0.87 | 0.97 | NA    | A   | -0.28 | 0.058 | 7.30E-07 |
| rs3019449  | 6   | PARK2 | 4636 | 0.32 | 0.32 | 0.31 | 0.31 | 0.28 | 0.98                | 0.98 | 0.98 | 0.99 | 97.18 | A   | -0.11 | 0.022 | 7.42E-07 |
| rs9301951  | 13  | GPC6  | 4397 | 0.04 | 0.04 | 0.03 | 0.05 | NA   | 0.96                | 0.97 | 0.74 | 0.78 | NA    | C   | -0.25 | 0.051 | 1.35E-06 |
| rs11136566 | 8   | CSMD1 | 4610 | 0.39 | 0.39 | 0.36 | 0.39 | 0.46 | 0.99                | 0.98 | 0.97 | 0.96 | 97.39 | A   | -0.1  | 0.021 | 2.24E-06 |
| rs7744666  | 6   | NA    | 4466 | 0.1  | 0.09 | 0.06 | 0.1  | NA   | 0.99                | 1    | 0.97 | 0.96 | NA    | C   | 0.16  | 0.035 | 3.07E-06 |
| rs11969002 | 6   | NA    | 4466 | 0.1  | 0.09 | 0.06 | 0.1  | NA   | 0.99                | 1    | 0.97 | 0.96 | NA    | A   | 0.16  | 0.035 | 3.07E-06 |
| rs365962   | 16  | NA    | 4608 | 0.44 | 0.44 | 0.48 | 0.47 | 0.42 | 0.99                | 0.99 | 0.96 | 0.69 | 98.61 | C   | -0.1  | 0.020 | 3.10E-06 |
| rs387953   | 16  | NA    | 4683 | 0.46 | 0.45 | 0.48 | 0.46 | 0.43 | 1                   | 0.99 | 1    | 0.67 | 99.99 | G   | -0.09 | 0.020 | 3.37E-06 |
| rs737631   | 6   | PARK2 | 4303 | 0.28 | 0.29 | 0.23 | 0.28 | NA   | 0.92                | 0.91 | 0.89 | 0.83 | NA    | A   | -0.11 | 0.023 | 3.57E-06 |
| rs4802666  | 19  | MYH14 | 4094 | 0.27 | 0.27 | 0.18 | 0.27 | NA   | 0.7                 | 0.74 | 0.76 | 0.64 | NA    | A   | -0.13 | 0.027 | 3.76E-06 |
| rs1154053  | 8   | NA    | 4639 | 0.17 | 0.17 | 0.18 | 0.16 | 0.2  | 0.99                | 1    | 0.96 | 0.89 | 96.17 | C   | -0.12 | 0.026 | 4.68E-06 |
| rs1205863  | 6   | NA    | 3939 | 0.06 | 0.06 | NA   | 0.06 | 0.07 | 0.99                | 1    | NA   | 0.99 | 98.23 | G   | 0.21  | 0.045 | 4.77E-06 |
| rs3749982  | 6   | NA    | 4458 | 0.1  | 0.09 | 0.06 | 0.1  | NA   | 0.99                | 1    | 0.96 | 0.96 | NA    | A   | 0.16  | 0.035 | 4.97E-06 |
| rs6457690  | 6   | NA    | 4464 | 0.1  | 0.09 | 0.07 | 0.11 | NA   | 0.98                | 1    | 0.96 | 0.97 | NA    | A   | 0.16  | 0.035 | 5.93E-06 |
| rs1029296  | 6   | NA    | 4464 | 0.1  | 0.09 | 0.07 | 0.11 | NA   | 0.98                | 1    | 0.96 | 0.97 | NA    | C   | 0.16  | 0.035 | 5.93E-06 |
| rs4875102  | 8   | NA    | 4608 | 0.26 | 0.26 | 0.27 | 0.25 | 0.29 | 0.99                | 0.99 | 0.95 | 0.91 | 97.65 | A   | -0.1  | 0.023 | 6.24E-06 |
| rs7234567  | 18  | NA    | 4682 | 0.26 | 0.26 | 0.22 | 0.22 | 0.29 | 1                   | 1    | 1    | 0.89 | 97.67 | A   | -0.1  | 0.023 | 6.34E-06 |

|            |    |        |      |      |      |      |      |      |      |      |      |      |       |   |       |       |          |
|------------|----|--------|------|------|------|------|------|------|------|------|------|------|-------|---|-------|-------|----------|
| rs6936004  | 6  | NA     | 4462 | 0.1  | 0.09 | 0.07 | 0.11 | NA   | 0.98 | 1    | 0.96 | 0.97 | NA    | C | 0.16  | 0.035 | 6.52E-06 |
| rs1884158  | 6  | PARK2  | 4491 | 0.31 | 0.32 | 0.31 | 0.31 | NA   | 0.98 | 0.99 | 0.99 | 0.91 | NA    | C | -0.1  | 0.022 | 6.54E-06 |
| rs1981483  | 16 | PIGQ   | 3939 | 0.42 | 0.43 | NA   | 0.42 | 0.47 | 0.99 | 0.98 | NA   | 0.44 | 99.64 | A | 0.1   | 0.022 | 6.79E-06 |
| rs10890236 | 1  | NA     | 4683 | 0.09 | 0.09 | 0.09 | 0.09 | 0.09 | 1    | 1    | 1    | 0.93 | 100   | C | 0.16  | 0.035 | 7.07E-06 |
| rs1029295  | 6  | NA     | 3747 | 0.1  | 0.09 | NA   | 0.11 | NA   | 0.98 | 1    | NA   | 0.97 | NA    | C | 0.16  | 0.037 | 7.08E-06 |
| rs763014   | 16 | RAB40C | 3939 | 0.42 | 0.43 | NA   | 0.43 | 0.47 | 0.98 | 0.99 | NA   | 0.42 | 99.4  | C | 0.1   | 0.022 | 7.28E-06 |
| rs10046257 | 6  | NA     | 4461 | 0.1  | 0.09 | 0.08 | 0.11 | NA   | 0.98 | 1    | 0.96 | 0.97 | NA    | A | 0.15  | 0.034 | 8.21E-06 |
| rs7204439  | 16 | RAB40C | 3939 | 0.42 | 0.43 | NA   | 0.43 | 0.47 | 0.97 | 0.98 | NA   | 0.43 | 97.37 | C | 0.1   | 0.022 | 8.23E-06 |
| rs9469300  | 6  | NA     | 4482 | 0.1  | 0.09 | 0.07 | 0.1  | NA   | 0.99 | 1    | 0.92 | 0.96 | NA    | A | 0.15  | 0.035 | 8.73E-06 |
| rs7205409  | 16 | RAB40C | 4590 | 0.42 | 0.43 | 0.45 | 0.43 | 0.47 | 0.99 | 0.99 | 0.96 | 0.44 | 99.33 | C | 0.09  | 0.021 | 8.78E-06 |
| rs10998466 | 10 | NA     | 4446 | 0.01 | 0.01 | 0.01 | 0.02 | NA   | 0.75 | 0.97 | 0.73 | 0.51 | NA    | A | -0.47 | 0.107 | 9.70E-06 |

### Legend to Supplementary Table 2

Studies contributing data are denoted RS1: Rotterdam study cohort 1; RS3: Rotterdam study cohort 3; TUK: TwinsUK; BMI: body mass index; FHS: Framingham Heart Study; GARP: Genetics of OsteoArthrosis and Progression study;

SNP single nucleotide polymorphism; Chr chromosome; position, SNP location in base pairs; MAF minor allele frequency;

\*R<sup>2</sup> from MACH for RS1, RS3, FHS and GARP; Information score from IMPUTE for TUK

Eff All, effect allele; beta, effect size; SE, standard error of beta; p, p value

Supplementary Figure 1. Quantile-quantile plot of meta-analysis adjusted GWA results

**Legend to Supplementary Figure 1**

The plots show GWA meta-analysis quantile-quantile plot of observed against expected results, adjusted for age and sex

**Supplementary Figure 2. Manhattan plot for meta-analysis of adjusted GWA results**

**Legend to Supplementary Figure 2**

Plot shows combined results for the 5 studies included in the meta-analysis, adjusted for age and sex. The blue and red horizontal lines mark the levels of suggestive and likely significance, respectively

**Supplementary Figure 3. Regional plot of association results and recombination rates for the class II MHC region unadjusted for age and sex**

**Legend to Supplementary Figure 3**

$-\log_{10} P$  values ( $y$  axis) of the SNPs are shown according to their chromosomal positions ( $x$  axis) with lead SNP shown as a purple diamond. The colour intensity of each symbol depicting a SNP reflects the extent of LD with the rs926849, coloured red ( $r^2 > 0.8$ ) through to blue ( $r^2 < 0.2$ ). Genetic recombination rates (cM/Mb), estimated using HapMap CEU samples, are shown with a light blue line. Physical positions are based on build 36 (NCBI) of the human genome. Also shown are the relative positions of genes mapping to the region of association. Genes have been redrawn to show the relative positions, and therefore, the maps are not to physical scale.

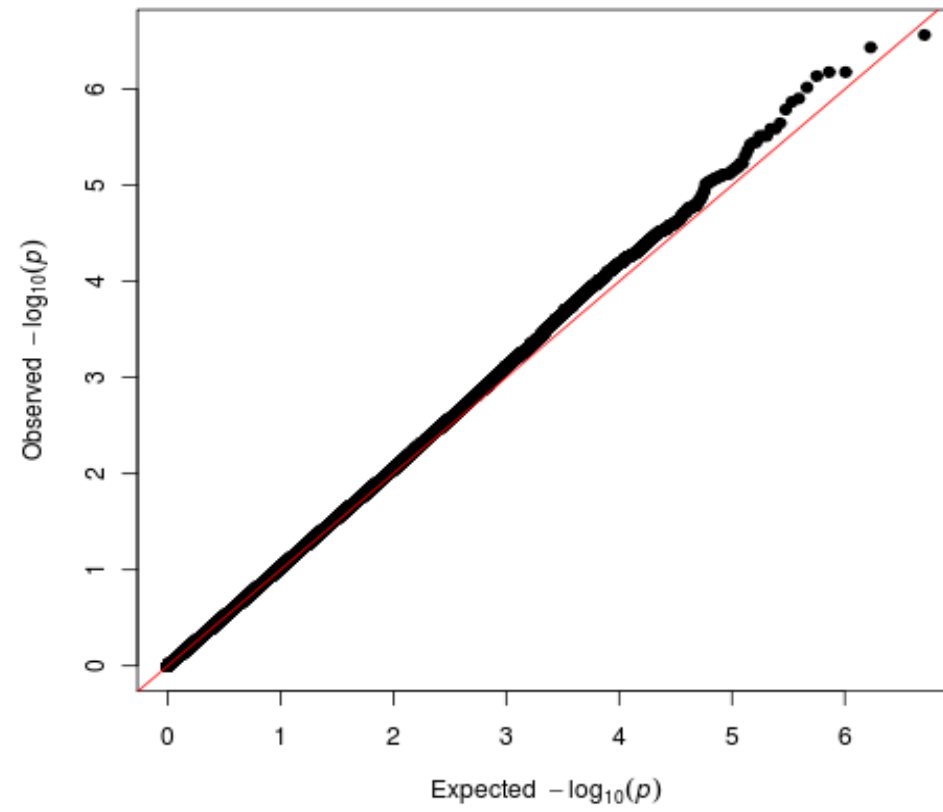

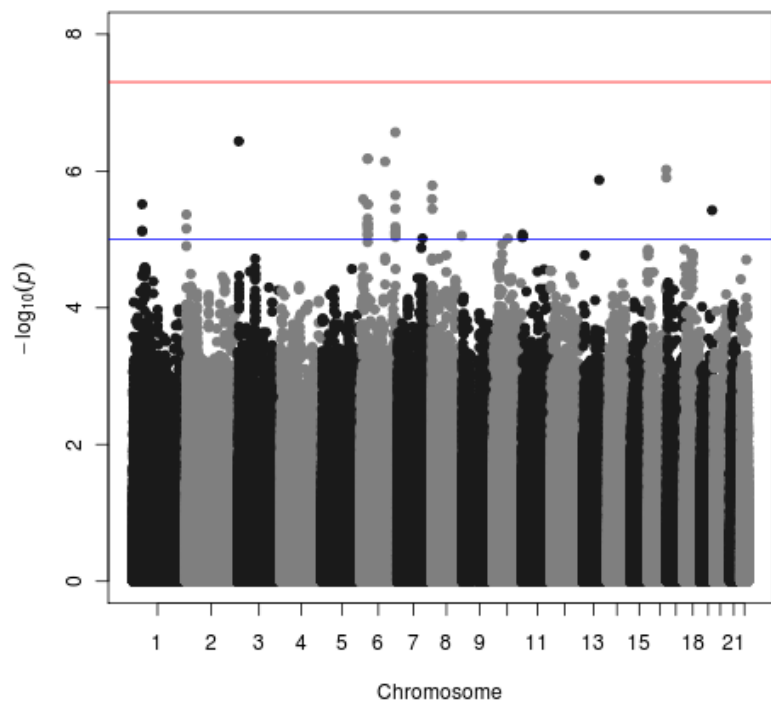



Plotted SNPs |

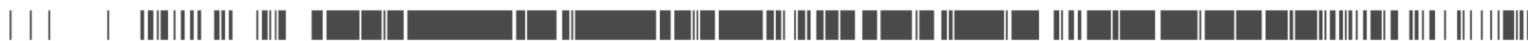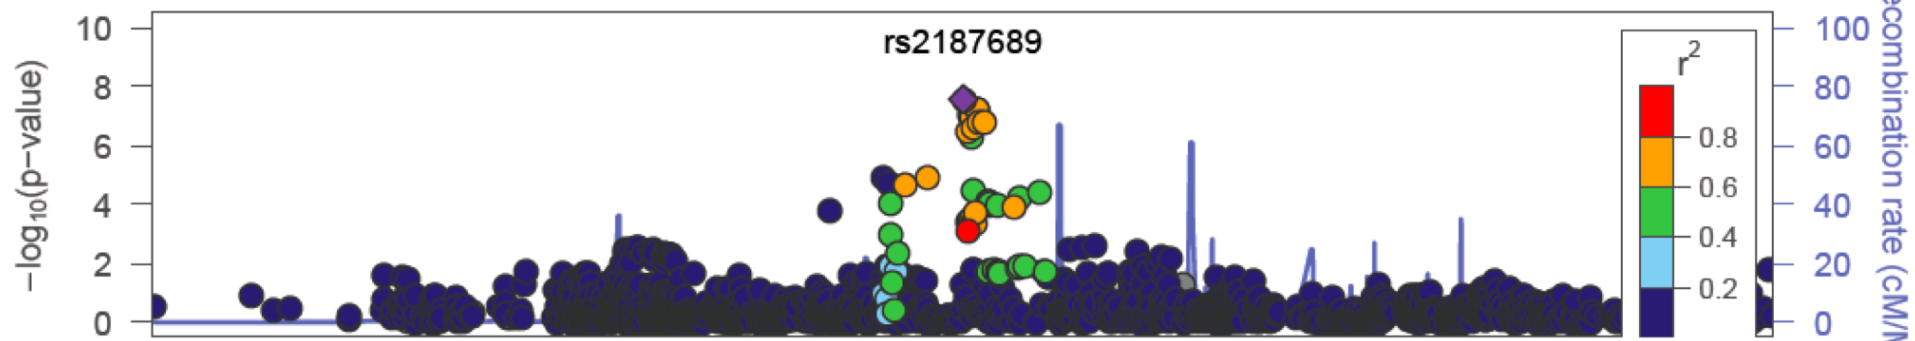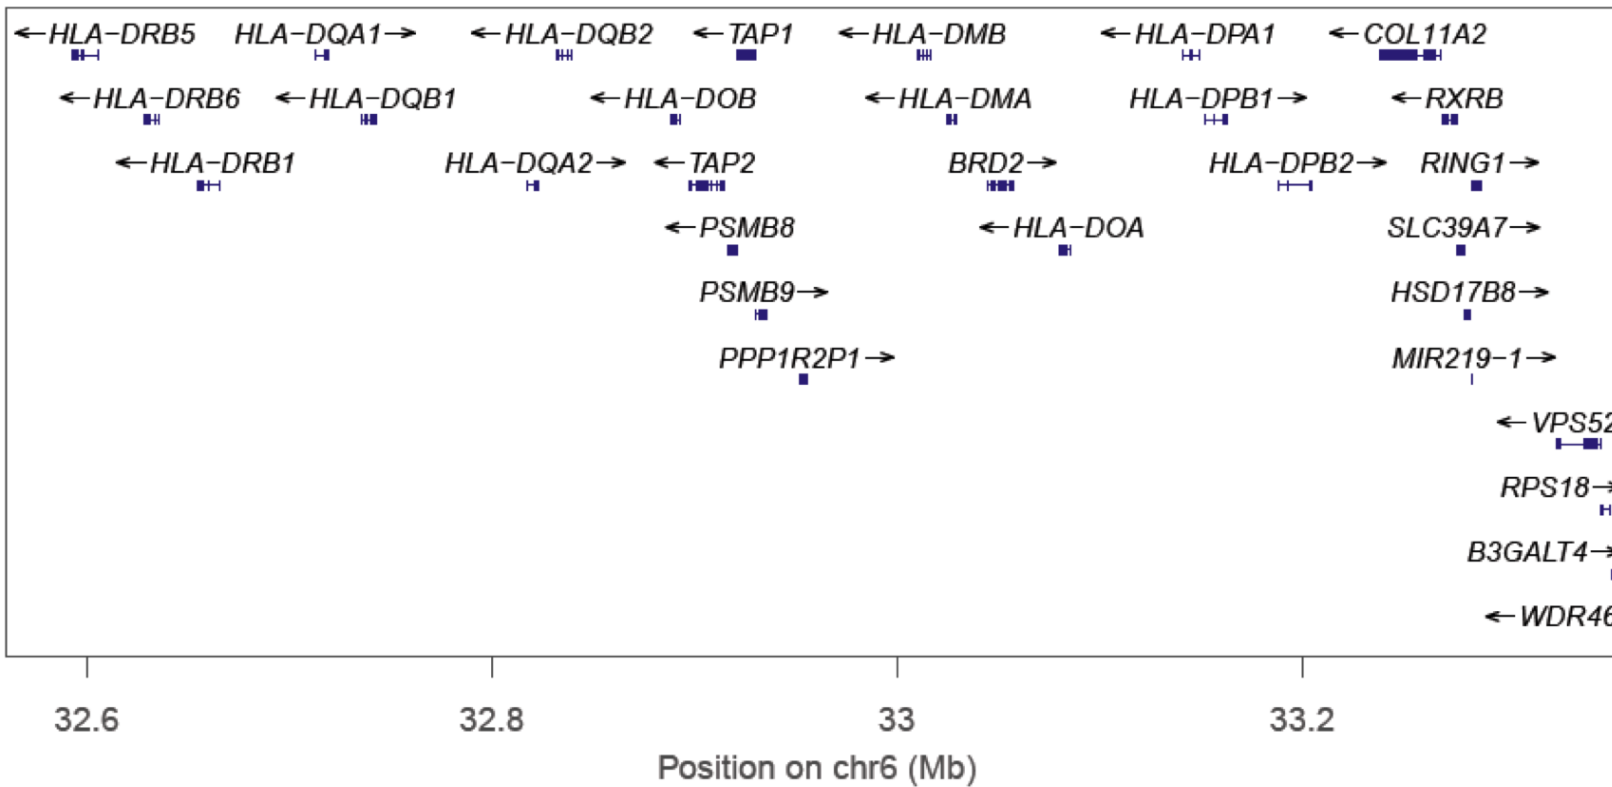

Supplement: annrheumdis-2012-201551supp.pdf [file annrheumdis-2012-201551supp.pdf]
